# Supplementary material
Source: Springer Nature journal article supplement (https://www.springermedizin.de/resource/supplementary/12885_2011_3165_MOESM6_ESM.pdf/9464224)

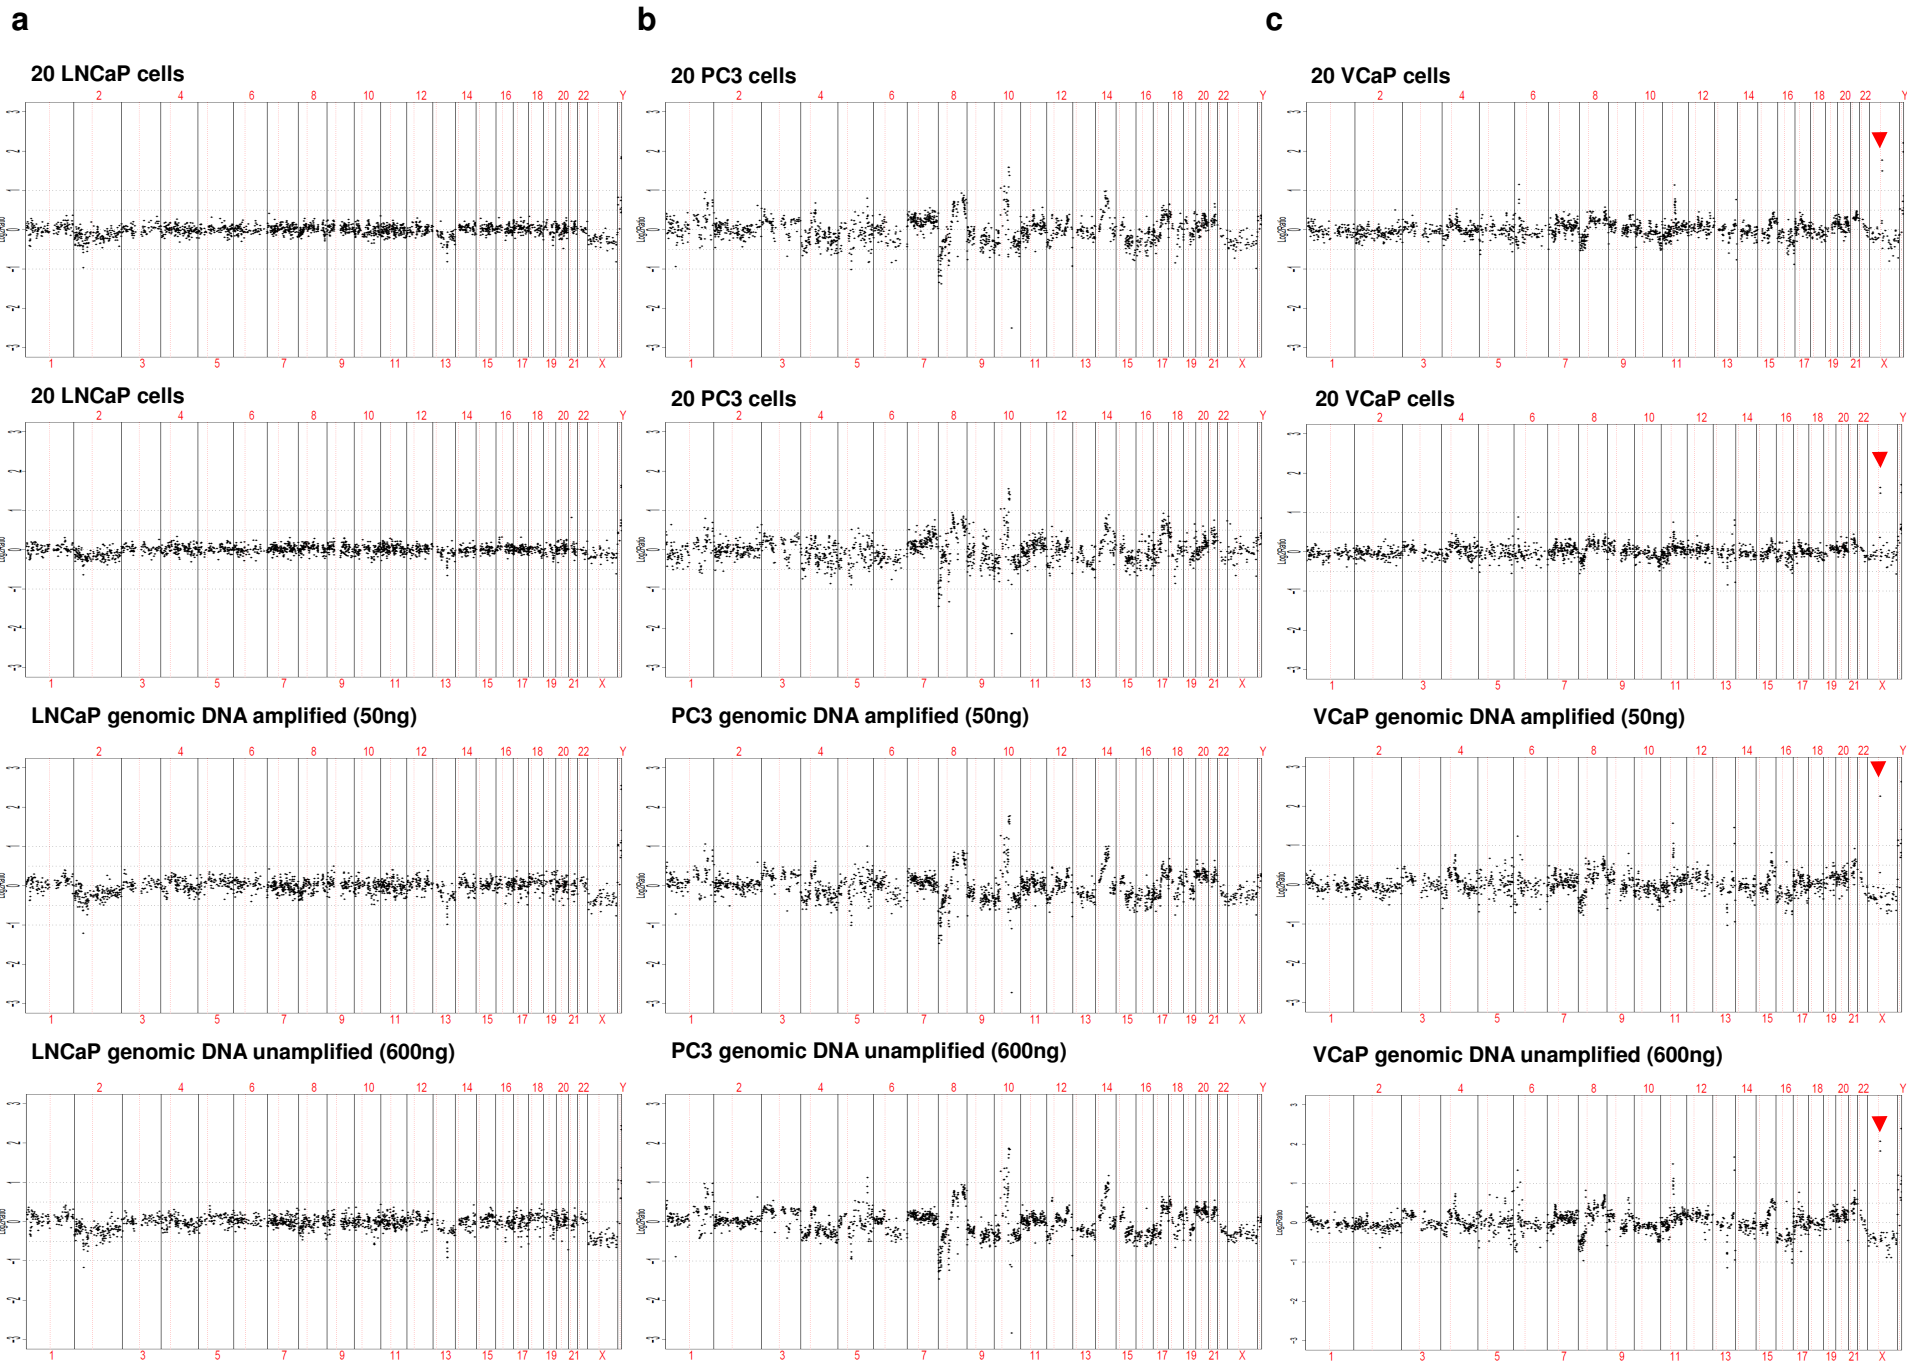

Supplement: MOESM6 [file 9464224]
